# Supplementary material for: Transcriptomics reveals the mechanism of branching production in response to GR24 in A. gallica 541
Source: Research Square preprint supplement (doi:10.21203/rs.3.rs-5030017/v1), 2025-04-15
Supplement: Supplementary file 1 [file 177a44a6417dbd87c12c620a.docx]

**Table S1** Specific primer sequences used for qRT-PCR

**Table S2** Transcriptome sequencing quality statistics table

**Table S3** Transcriptome sequencing data analysis
