# Supplementary material for: Transcriptomics reveals the mechanism of branching production in response to GR24 in A. gallica 541
Source: Research Square preprint supplement (doi:10.21203/rs.3.rs-5030017/v1), 2025-04-15
Supplement: Supplementary file 2 [file 8fd409dde1747860e4dde265.xlsx]

## Sheet: Sheet1
Sample	Total Reads	Reads mapped	Unique mapped	Multi mapped	Read1 mapped	Read2 mapped	'+' mapped	'-' mapped
CK-1	51006066	39070252(76.60%)	38508804(75.50%)	599448(1.10%)	19449564(38.13%)	19059240(37.37%)	19193440(37.63%)	19315364(37.87%)
CK-2	70494348	54060695(76.69%)	53202665(75.47%)	911167(1.22%)	26877746(38.13%)	26324919(37.34%)	26497156(37.59%)	26705509(37.88%)
CK-3	69970386	53178723(76.00%)	52344948(74.81%)	891493(1.19%)	26366158(37.68%)	25978790(37.13%)	26092648(37.29%)	26252300(37.52%)
GR24-1	57133506	43697470(76.48%)	43099282(75.44%)	636237(1.05%)	21785834(38.13%)	21313448(37.30%)	21467619(37.57%)	21631663(37.86%)
GR24-2	56122420	43105469(76.81%)	42508633(75.74%)	634907(1.06%)	21457678(38.23%)	21050955(37.51%)	21169303(37.72%)	21339330(38.02%)
GR24-3	55130214	42485299(77.06%)	41883395(75.97%)	642423(1.09%)	21120379(38.31%)	20763016(37.66%)	20865140(37.85%)	21018255(38.12%)
