# Supplementary material for: Transcriptomics reveals the mechanism of branching production in response to GR24 in A. gallica 541
Source: Research Square preprint supplement (doi:10.21203/rs.3.rs-5030017/v1), 2025-04-15
Supplement: Supplementary file 3 [file addd9a40a07ccc32e2e0f305.docx]

**Figure S1** GR24-treated and CK samples were the significant groups determined by the principal component analysis (PCA)

**Figure S2** Differentially expressed genes were enriched to the diterpene synthesis pathway. The enzymes labeled in the red box were associated with up-regulated genes and the numbers in the box represent the enzyme number (EC number).

**Figure S3** Differentially expressed genes were enriched to the pentose and glucuronate interconversions pathway. The enzymes labeled in the red box were associated with up-regulated genes and the enzymes labeled in the blue box were related to both up-regulated and down-regulated genes. The numbers in the box represent the enzyme number (EC number).
