# Supplementary material for: Transcriptomics reveals the mechanism of branching production in response to GR24 in A. gallica 541
Source: Research Square preprint supplement (doi:10.21203/rs.3.rs-5030017/v1), 2025-04-15
Supplement: Supplementary file 4 [file cc9c6917d437fa26cc9628a6.xlsx]

## Sheet: Sheet1
Sample	Raw Reads	Clean Reads	Clean Base(G)	Error Rate(%)	Q20(%)	Q30(%)	GC Content(%)
GR24-1	60208230	57133506	8.57	0.03	97.76	93.65	51.42
GR24-2	59163658	56122420	8.42	0.03	97.24	92.64	51.64
GR24-3	58351428	55130214	8.27	0.03	97.44	93.13	51.53
CK-1	53690712	51006066	7.65	0.03	97.78	93.71	51.68
CK-2	73241008	70494348	10.57	0.03	97.67	93.41	51.76
CK-3	73843954	69970386	10.5	0.03	97.72	93.61	51.67
