# Supplementary material for: Transcriptomics reveals the mechanism of branching production in response to GR24 in A. gallica 541
Source: Research Square preprint supplement (doi:10.21203/rs.3.rs-5030017/v1), 2025-04-15
Supplement: Supplementary file 5 [file e00a0336515af18092ac61e6.xlsx]

## Sheet: Sheet1
Primer	5' to 3'
ARMGADRAFT_1005092-F	AAGATGCGAGTGCTATGC
ARMGADRAFT_1005092-R	AGAGGAAGCCCGACAAAC
ARMGADRAFT_1008527-F	TTCAGGGACAACATACCGA
ARMGADRAFT_1008527-R	AAGAGGAAGCCCGACAAAC
ARMGADRAFT_1079576-F	CATTCTTCGCCTCACCTTG
ARMGADRAFT_1079576-R	GATGGCTGCTACATTCACA
ARMGADRAFT_1100908-F	GTTATTCCCGCTGGCACTCA
ARMGADRAFT_1100908-R	CACCTTCCTGCTTCCTCCCT
ARMGADRAFT_1005234-F	TCCTCCTCCAGTTCCTAC
ARMGADRAFT_1005234-R	GTTGCGAGCACAGTTATT
ARMGADRAFT_1076342-F	TCGTGCTTTCATCGTCCTT
ARMGADRAFT_1076342-R	CACTCATAGCCGCTGTCG
ARMGADRAFT_1000760-F	CTGCTCGTTGCTGTCCCT
ARMGADRAFT_1000760-R	TTCCGTTGTCCTTGGTGG
ARMGADRAFT_1001369-F	CCCCAATCCCTACTTACA
ARMGADRAFT_1001369-R	GCCATACGAGGAACCAAA
ARMGADRAFT_1002015-F	ATTGAGTTGGGCAGTGTA
ARMGADRAFT_1002015-R	GATGGGCTTTGATGTATGT
ARMGADRAFT_1002864-F	GGGGCGGAATGTTTACTG
ARMGADRAFT_1002864-R	CGAGAATGAACCGACCAC
ARMGADRAFT_1014343-F	TGGGCGGTTGTAGTCAGCG
ARMGADRAFT_1014343-R	TTGCGGGTCAAGGCATCTC
ARMGADRAFT_1166674-F	GTGGACCCTTACCATTTC
ARMGADRAFT_1166674-R	AATAGTTTCGTAGGCAGGT
EF-1γ-F	TGCTCGGCTCGACTCCAGAAGA
EF-1γ-R	TGGCACCGCATTGGATGAAGGC
